# Supplementary material
Source: PubMed Central journal article supplement (PMC6346270)
Supplement: NIHMS1513220-supplement-Revised_online_material.pdf [file NIHMS1513220-supplement-Revised_online_material.pdf]

**2017 ACC/AHA Blood Pressure Guideline treatment recommendations and risk for  
cardiovascular events and all-cause mortality**

**Online material**

Lisandro D Colantonio,<sup>1</sup> MD PhD, John N Booth III,<sup>1</sup> PhD, Adam P Bress,<sup>2</sup> PharmD MS, Paul K  
Whelton,<sup>3</sup> MB MD MSc, Daichi Shimbo,<sup>4</sup> MD, Emily B Levitan,<sup>1</sup> PhD, George Howard,<sup>5</sup> DrPh,  
Monika M Safford,<sup>6</sup> MD, Paul Muntner,<sup>1</sup> PhD

<sup>1</sup> Department of Epidemiology, University of Alabama at Birmingham, Birmingham AL

<sup>2</sup> Department of Population Health Sciences, University of Utah, Salt Lake City UT

<sup>3</sup> Department of Epidemiology, Tulane University, New Orleans LA

<sup>4</sup> Department of Medicine, Columbia University, New York NY

<sup>5</sup> Department of Biostatistics, University of Alabama at Birmingham, Birmingham AL

<sup>6</sup> Department of Medicine, Weill Cornell Medical College, New York NY

*Corresponding author:*

Lisandro D. Colantonio, 1700 University Blvd, LHL 442, Birmingham, AL 35294-0013, Phone:  
205-259-6415, Fax: 205-975-7058, Email: [lcolantonio@uab.edu](mailto:lcolantonio@uab.edu).

**Online Table 1.** Definitions for baseline characteristics.

| <b>Baseline characteristics</b>   | <b>Definitions</b>                                                                                                                                                                                                                                                                                                                                                                                                                                                                                                                                                                                                                                                                                                                                                                                                                                                                                                                                            |
|-----------------------------------|---------------------------------------------------------------------------------------------------------------------------------------------------------------------------------------------------------------------------------------------------------------------------------------------------------------------------------------------------------------------------------------------------------------------------------------------------------------------------------------------------------------------------------------------------------------------------------------------------------------------------------------------------------------------------------------------------------------------------------------------------------------------------------------------------------------------------------------------------------------------------------------------------------------------------------------------------------------|
| Region of residence               | Stroke buckle includes coastal North Carolina, South Carolina and Georgia.<br>Stroke belt includes the remaining parts of North Carolina, South Carolina and Georgia, and Tennessee, Mississippi, Alabama, Louisiana and Arkansas.<br>Other US regions includes the remaining 40 contiguous US states and the District of Columbia.                                                                                                                                                                                                                                                                                                                                                                                                                                                                                                                                                                                                                           |
| History of cardiovascular disease | Any of the following:<br>(1) a self-reported history of stroke, myocardial infarction or coronary revascularization;<br>(2) evidence of a previous myocardial infarction on the study electrocardiogram, or<br>(3) use of one or more medications to treat heart failure based on the medication inventory, including: <ul style="list-style-type: none"><li>• Digoxin (if participants had no atrial fibrillation at baseline by self-report or based on the study electrocardiogram)</li><li>• Carvedilol</li><li>• Spironolactone</li><li>• Hydralazine in combination with isosorbide mono- or di-nitrate</li><li>• Loop diuretic (i.e., furosemide, bumetanide, torsemide)</li><li>• Angiotensin-converting enzyme inhibitor or angiotensin II receptor blocker in combination with a beta-blocker (if participants had SBP &lt;140 mm Hg, DBP &lt;90 mm Hg and self-reported not taking medication to lower their blood pressure at baseline)</li></ul> |
| Diabetes                          | Fasting glucose $\geq 126$ mg/dL, non-fasting glucose $\geq 200$ mg/dL for those who did not fast (n=4,099), or self-report of a prior diagnosis of diabetes with current use of insulin or oral hypoglycemic medication                                                                                                                                                                                                                                                                                                                                                                                                                                                                                                                                                                                                                                                                                                                                      |
| Chronic kidney disease            | Self-report of being on dialysis, or a calculated estimated glomerular filtration rate <60 ml/min/1.73 m <sup>2</sup> or albumin-to-creatinine ratio $\geq 30$ mg/g                                                                                                                                                                                                                                                                                                                                                                                                                                                                                                                                                                                                                                                                                                                                                                                           |
| Low body mass index               | Body mass index <18.5 kg/m <sup>2</sup>                                                                                                                                                                                                                                                                                                                                                                                                                                                                                                                                                                                                                                                                                                                                                                                                                                                                                                                       |
| Cognitive impairment              | Calculated Six-item screener score $\leq 4$ (1)                                                                                                                                                                                                                                                                                                                                                                                                                                                                                                                                                                                                                                                                                                                                                                                                                                                                                                               |
| Depressive symptoms               | Calculated score $\geq 4$ on the Four-item Center for Epidemiological Studies Depression Scale (CES-D) (2)                                                                                                                                                                                                                                                                                                                                                                                                                                                                                                                                                                                                                                                                                                                                                                                                                                                    |
| Exhaustion                        | Replying “little of the time or none of the time” to the SF-12 question “how much of the time during the past 4 weeks did you have a lot of energy?” (3)                                                                                                                                                                                                                                                                                                                                                                                                                                                                                                                                                                                                                                                                                                                                                                                                      |
| Impaired mobility                 | Replying “limited a lot” to the SF-12 question: “does your health now limit you in climbing several flights of stairs?” (3)                                                                                                                                                                                                                                                                                                                                                                                                                                                                                                                                                                                                                                                                                                                                                                                                                                   |
| History of falls                  | Replying “yes” to the question “During the last year, have you had a fall? Do not include falls during skiing, skating or other activities that may affect balance” and replying “two or more” to the question “How many times have you fallen in the last year?”                                                                                                                                                                                                                                                                                                                                                                                                                                                                                                                                                                                                                                                                                             |

DBP: diastolic blood pressure; SBP: systolic blood pressure; SF-12: 12-Item Short Form Survey.

**Online Table 2.** Blood pressure levels used to recommend pharmacological antihypertensive treatment initiation (top panel) and intensification (bottom panel) according to the 2017 ACC/AHA blood pressure guideline.

|                                                                                               | <b>SBP, mm Hg</b> | <b>DBP, mm Hg</b> |
|-----------------------------------------------------------------------------------------------|-------------------|-------------------|
| <i>Adults not taking antihypertensive medication - antihypertensive treatment initiation</i>  |                   |                   |
| General population                                                                            | ≥140              | ≥90               |
| Diabetes or CKD                                                                               | ≥130              | ≥80               |
| History of CVD or 10-year CVD risk ≥10%*                                                      | ≥130              | ≥80               |
| Age ≥65 years                                                                                 | ≥130              | †                 |
| <i>Adults taking antihypertensive medication – antihypertensive treatment intensification</i> |                   |                   |
| General population <65 years of age                                                           | ≥130              | ≥80               |
| General population ≥65 years of age                                                           | ≥130              | †                 |
| Diabetes or CKD                                                                               | ≥130              | ≥80               |
| History of CVD or 10-year CVD risk ≥10%*                                                      | ≥130              | ≥80               |

ACC: American College of Cardiology; AHA: American Heart Association; CKD: chronic kidney disease; CVD: cardiovascular disease; DBP: diastolic blood pressure; SBP: systolic blood pressure.

In the top panel, adults with SBP or DBP above or equal to the levels listed are recommended antihypertensive medication initiation.

In the bottom panel, adults with SBP or DBP above or equal to the levels listed are recommended antihypertensive medication intensification.

\* The 10-year predicted CVD risk is calculated using the Pooled Cohort risk equations (4).

† No specific DBP threshold is provided in the guideline for adults ≥65 years of age. The other DBP thresholds listed from the guideline should be applied, as appropriate.

**Online Table 3.** Baseline characteristics of REGARDS study participants not taking antihypertensive medication with SBP between 130 and 139 mm Hg or DBP between 80 and 89 mm Hg according to their recommendation for pharmacological treatment initiation by the 2017 ACC/AHA blood pressure guideline.

| Characteristics                                        | Recommended pharmacological antihypertensive medication initiation* |              |
|--------------------------------------------------------|---------------------------------------------------------------------|--------------|
|                                                        | No                                                                  | Yes          |
| N                                                      | 1,567                                                               | 2,632        |
| Age, years, mean (SD)                                  | 56.7 (5.7)                                                          | 67.8 (8.8)   |
| Male, n (%)                                            | 612 (39.1)                                                          | 1,590 (60.4) |
| Black, n (%)                                           | 596 (38.0)                                                          | 885 (33.6)   |
| Geographic region of residence, n (%)                  |                                                                     |              |
| Stroke belt <sup>†</sup>                               | 521 (33.2)                                                          | 851 (32.3)   |
| Stroke buckle <sup>‡</sup>                             | 327 (20.9)                                                          | 479 (18.2)   |
| Other US regions <sup>§</sup>                          | 719 (45.9)                                                          | 1,302 (49.5) |
| Less than high school education, n (%)                 | 87 (5.6)                                                            | 331 (12.6)   |
| Current smoking, n (%)                                 | 148 (9.4)                                                           | 445 (17.0)   |
| SBP, mm Hg, mean (SD)                                  | 125.3 (8.4)                                                         | 129.7 (7.1)  |
| DBP, mm Hg, mean (SD)                                  | 81.3 (3.8)                                                          | 78.9 (6.2)   |
| Total cholesterol, mg/dL, mean (SD)                    | 201.8 (36.9)                                                        | 195.9 (40.4) |
| HDL cholesterol, mg/dL, mean (SD)                      | 55.3 (15.7)                                                         | 49.8 (15.6)  |
| Statin use, n (%)                                      | 223 (14.3)                                                          | 656 (25.0)   |
| History of CVD or 10-year CVD risk $\geq 10\%$ , n (%) | 0 (0.0)                                                             | 2,278 (86.6) |
| Age $\geq 65$ years with SBP $\geq 130$ mm Hg, n (%)   | 0 (0.0)                                                             | 1,196 (45.4) |
| Diabetes, n (%)                                        | 0 (0.0)                                                             | 538 (20.9)   |
| Chronic kidney disease, n (%)                          | 0 (0.0)                                                             | 590 (22.6)   |
| Frailty indicators, n (%)                              |                                                                     |              |
| Depressive symptoms                                    | 147 (9.5)                                                           | 209 (8.0)    |
| Low body mass index                                    | 7 (0.4)                                                             | 21 (0.8)     |
| Cognitive impairment                                   | 59 (4.4)                                                            | 185 (9.4)    |
| Exhaustion                                             | 132 (8.4)                                                           | 274 (10.4)   |
| Impaired mobility                                      | 122 (7.8)                                                           | 343 (13.0)   |
| History of falls                                       | 69 (4.4)                                                            | 172 (6.5)    |

ACC: American College of Cardiology; AHA: American Heart Association; CVD: cardiovascular disease; DBP: diastolic blood pressure; HDL: high-density lipoprotein; REGARDS: REasons for Geographic and Racial Differences in Stroke; SBP: systolic blood pressure; SD: standard deviation; US: United States.

\* Recommendations for antihypertensive medication initiation according to the 2017 ACC/AHA blood pressure guideline include SBP between 130 and 139 mm Hg or DBP between 80 and 89 mm Hg with diabetes, chronic kidney disease, a history of CVD or a 10-year predicted CVD risk  $\geq 10\%$ , or age  $\geq 65$  years with SBP  $\geq 130$  mm Hg.

<sup>†</sup> Stroke buckle includes coastal North Carolina, South Carolina and Georgia.

<sup>‡</sup> Stroke belt includes the remaining parts of the stroke buckle states and Tennessee, Mississippi, Alabama, Louisiana and Arkansas.

<sup>§</sup> Other US regions includes the remaining 40 contiguous US states and the District of Columbia.

**Online Table 4.** Rates of CVD events and all-cause mortality among 14,039 REGARDS study participants not taking antihypertensive medication by blood pressure category and recommendation for pharmacological antihypertensive treatment initiation stratified by gender and race.

|                                                                                                                           | CVD events               |                                         | All-cause mortality      |                                         |
|---------------------------------------------------------------------------------------------------------------------------|--------------------------|-----------------------------------------|--------------------------|-----------------------------------------|
|                                                                                                                           | Events /<br>Person-years | Rate (95% CI) per<br>1,000 person-years | Events /<br>Person-years | Rate (95% CI) per<br>1,000 person-years |
| <b>Men</b>                                                                                                                |                          |                                         |                          |                                         |
| <b>SBP/DBP, mm Hg*</b>                                                                                                    |                          |                                         |                          |                                         |
| <130 and <80                                                                                                              | 358 / 24,987             | 14.3 (12.8, 15.8)                       | 625 / 26,111             | 23.9 (22.1, 25.8)                       |
| 130-139 or 80-89                                                                                                          | 293 / 16,987             | 17.2 (15.3, 19.2)                       | 408 / 17,885             | 22.8 (20.6, 25.0)                       |
| ≥140 or ≥90                                                                                                               | 224 / 8,469              | 26.4 (23.0, 29.9)                       | 347 / 9,077              | 38.2 (34.2, 42.3)                       |
| <b>Recommendation for antihypertensive medication initiation by the 2017 ACC/AHA blood pressure guideline<sup>†</sup></b> |                          |                                         |                          |                                         |
| Not recommended                                                                                                           | 19 / 5,023               | 3.8 (2.1, 5.5)                          | 25 / 5,081               | 4.9 (3.0, 6.8)                          |
| Recommended                                                                                                               | 274 / 11,964             | 22.9 (20.2, 25.6)                       | 383 / 12,804             | 29.9 (26.9, 32.9)                       |
| <b>Women</b>                                                                                                              |                          |                                         |                          |                                         |
| <b>SBP/DBP, mm Hg*</b>                                                                                                    |                          |                                         |                          |                                         |
| <130 and <80                                                                                                              | 241 / 33,593             | 7.2 (6.3, 8.1)                          | 434 / 34,290             | 12.7 (11.5, 13.8)                       |
| 130-139 or 80-89                                                                                                          | 151 / 15,146             | 10.0 (8.4, 11.6)                        | 266 / 15,580             | 17.1 (15.0, 19.1)                       |
| ≥140 or ≥90                                                                                                               | 132 / 7,242              | 18.2 (15.1, 21.3)                       | 204 / 7,652              | 26.7 (23.0, 30.3)                       |
| <b>Recommendation for antihypertensive medication initiation by the 2017 ACC/AHA blood pressure guideline<sup>†</sup></b> |                          |                                         |                          |                                         |
| Not recommended                                                                                                           | 24 / 7,592               | 3.2 (1.9, 4.4)                          | 36 / 7,658               | 4.7 (3.2, 6.2)                          |
| Recommended                                                                                                               | 127 / 7,554              | 16.8 (13.9, 19.7)                       | 230 / 7,922              | 29.0 (25.3, 32.8)                       |
| <b>Blacks</b>                                                                                                             |                          |                                         |                          |                                         |
| <b>SBP/DBP, mm Hg*</b>                                                                                                    |                          |                                         |                          |                                         |
| <130 and <80                                                                                                              | 143 / 13,995             | 10.2 (8.5, 11.9)                        | 300 / 14,427             | 20.8 (18.4, 23.1)                       |
| 130-139 or 80-89                                                                                                          | 122 / 10,977             | 11.1 (9.1, 13.1)                        | 246 / 11,287             | 21.8 (19.1, 24.5)                       |
| ≥140 or ≥90                                                                                                               | 130 / 6,466              | 20.1 (16.6, 23.6)                       | 214 / 6,853              | 31.2 (27.0, 35.4)                       |
| <b>Recommendation for antihypertensive medication initiation by the 2017 ACC/AHA blood pressure guideline<sup>†</sup></b> |                          |                                         |                          |                                         |
| Not recommended                                                                                                           | 9 / 4,588                | 2.0 (0.7, 3.2)                          | 22 / 4,613               | 4.8 (2.8, 6.8)                          |
| Recommended                                                                                                               | 113 / 6,389              | 17.7 (14.4, 20.9)                       | 224 / 6,674              | 33.6 (29.2, 38.0)                       |

**Whites**

| <b>SBP/DBP, mm Hg*</b>                                                                                                    |              |                   |              |                   |
|---------------------------------------------------------------------------------------------------------------------------|--------------|-------------------|--------------|-------------------|
| <130 and <80                                                                                                              | 456 / 44,586 | 10.2 (9.3, 11.2)  | 759 / 45,973 | 16.5 (15.3, 17.7) |
| 130-139 or 80-89                                                                                                          | 322 / 21,157 | 15.2 (13.6, 16.9) | 428 / 22,178 | 19.3 (17.5, 21.1) |
| ≥140 or ≥90                                                                                                               | 226 / 9,244  | 24.4 (21.3, 27.6) | 337 / 9,876  | 34.1 (30.5, 37.8) |
| <b>Recommendation for antihypertensive medication initiation by the 2017 ACC/AHA blood pressure guideline<sup>†</sup></b> |              |                   |              |                   |
| Not recommended                                                                                                           | 34 / 8,027   | 4.2 (2.8, 5.7)    | 39 / 8,126   | 4.8 (3.3, 6.3)    |
| Recommended                                                                                                               | 288 / 13,129 | 21.9 (19.4, 24.5) | 389 / 14,052 | 27.7 (24.9, 30.4) |

ACC: American College of Cardiology; AHA: American Heart Association; CVD: cardiovascular disease; REGARDS: REasons for Geographic and Racial Differences in Stroke.

\* Blood pressure categories are mutually exclusive. Participants whose SBP and DBP correspond to two separate categories were assigned to the higher blood pressure group.

<sup>†</sup> Analyses of the recommendation for antihypertensive medication initiation were restricted to participants with SBP between 130 and 139 mm Hg or DBP between 80 and 89 mm Hg. Recommendations for antihypertensive medication initiation according to the 2017 ACC/AHA blood pressure guideline include SBP between 130 and 139 mm Hg or DBP between 80 and 89 mm Hg with diabetes, chronic kidney disease, a history of CVD or a 10-year predicted CVD risk ≥10%, or age ≥65 years with SBP ≥130 mm Hg. All participants with SBP ≥140 mm Hg or DBP ≥90 mm Hg are recommended antihypertensive medication initiation by the 2017 ACC/AHA blood pressure guideline.

The median follow-up for CVD events was 8.3 years (maximum 11.9 years). The median follow-up for all-cause mortality was 8.5 years (maximum 11.9 years).

**Online Table 5.** Baseline characteristics of REGARDS study participants taking antihypertensive medication by blood pressure categories.

| Characteristics                                | SBP/DBP, mm Hg* |                  |              |
|------------------------------------------------|-----------------|------------------|--------------|
|                                                | <130 and <80    | 130-139 or 80-89 | ≥140 or ≥90  |
| n                                              | 5,586           | 5,089            | 4,504        |
| Age, years, mean (SD)                          | 66.2 (9.2)      | 65.7 (8.9)       | 66.8 (9.0)   |
| Male, n (%)                                    | 2,188 (39.2)    | 2,249 (44.2)     | 2,072 (46.0) |
| Black, n (%)                                   | 2,474 (44.3)    | 2,588 (50.9)     | 2,598 (57.7) |
| Geographic region of residence, n (%)          |                 |                  |              |
| Stroke belt <sup>†</sup>                       | 1,923 (34.4)    | 1,821 (35.8)     | 1,616 (35.9) |
| Stroke buckle <sup>‡</sup>                     | 1,389 (24.9)    | 1,012 (19.9)     | 858 (19.0)   |
| Other US regions <sup>§</sup>                  | 2,274 (40.7)    | 2,256 (44.3)     | 2,030 (45.1) |
| Less than high school education, n (%)         | 754 (13.5)      | 742 (14.6)       | 852 (19.0)   |
| Current smoking, n (%)                         | 737 (13.2)      | 654 (12.9)       | 669 (14.9)   |
| SBP, mm Hg, mean (SD)                          | 117.3 (8.3)     | 129.9 (7.2)      | 150.5 (13.4) |
| DBP, mm Hg, mean (SD)                          | 70.2 (6.5)      | 79.3 (6.2)       | 84.9 (10.4)  |
| Total cholesterol, mg/dL, mean (SD)            | 183.7 (39.0)    | 187.5 (39.4)     | 191.5 (41.5) |
| HDL cholesterol, mg/dL, mean (SD)              | 50.4 (15.8)     | 50.6 (15.8)      | 50.9 (16.0)  |
| Statin use, n (%)                              | 2,425 (43.4)    | 2,111 (41.5)     | 1,698 (37.8) |
| History of CVD or 10-year CVD risk ≥10%, n (%) | 3,899 (69.8)    | 3,936 (77.3)     | 3,983 (88.4) |
| Age ≥65 years with SBP ≥130 mm Hg, n (%)       | 0 (0.0)         | 1,978 (38.9)     | 2,577 (57.2) |
| Diabetes, n (%)                                | 1,554 (28.8)    | 1,475 (29.7)     | 1,530 (35.1) |
| Chronic kidney disease, n (%)                  | 1,451 (26.3)    | 1,382 (27.4)     | 1,663 (37.3) |
| Frailty indicators, n (%)                      |                 |                  |              |
| Depressive symptoms                            | 646 (11.6)      | 633 (12.5)       | 613 (13.7)   |
| Low body mass index                            | 41 (0.7)        | 18 (0.4)         | 36 (0.8)     |
| Cognitive impairment                           | 369 (8.0)       | 353 (8.6)        | 384 (10.9)   |
| Exhaustion                                     | 944 (16.9)      | 854 (16.8)       | 850 (18.9)   |
| Impaired mobility                              | 1,164 (20.8)    | 1,096 (21.5)     | 1,018 (22.6) |
| History of falls                               | 520 (9.3)       | 405 (8.0)        | 423 (9.4)    |

CVD: cardiovascular disease; DBP: diastolic blood pressure; HDL: high-density lipoprotein; REGARDS: REasons for Geographic and Racial Differences in Stroke; SBP: systolic blood pressure; SD: standard deviation; US: United States.

\* Blood pressure categories are mutually exclusive. Participants whose SBP and DBP correspond to two separate categories were assigned to the higher blood pressure group.

<sup>†</sup> Stroke buckle includes coastal North Carolina, South Carolina and Georgia.

<sup>‡</sup> Stroke belt includes the remaining parts of the stroke buckle states and Tennessee, Mississippi, Alabama, Louisiana and Arkansas.

<sup>§</sup> Other US regions includes the remaining 40 contiguous US states and the District of Columbia.

**Online Table 6.** Baseline characteristics of REGARDS study participants taking antihypertensive medication with SBP between 130 and 139 mm Hg or DBP between 80 and 89 mm Hg according to their recommendation for pharmacological treatment intensification by the 2017 ACC/AHA blood pressure guideline.

| Characteristics                                        | Recommended pharmacological antihypertensive medication intensification* |              |
|--------------------------------------------------------|--------------------------------------------------------------------------|--------------|
|                                                        | No                                                                       | Yes          |
| N                                                      | 66                                                                       | 5,023        |
| Age, years, mean (SD)                                  | 66.8 (2.0)                                                               | 65.7 (8.9)   |
| Male, n (%)                                            | 0 (0.0)                                                                  | 2,249 (44.8) |
| Black, n (%)                                           | 34 (51.5)                                                                | 2,554 (50.8) |
| Geographic region of residence, n (%)                  |                                                                          |              |
| Stroke belt <sup>†</sup>                               | 14 (21.2)                                                                | 1,807 (36.0) |
| Stroke buckle <sup>‡</sup>                             | 13 (19.7)                                                                | 999 (19.9)   |
| Other US regions <sup>§</sup>                          | 39 (59.1)                                                                | 2,217 (44.1) |
| Less than high school education, n (%)                 | 6 (9.1)                                                                  | 736 (14.7)   |
| Current smoking, n (%)                                 | 0 (0.0)                                                                  | 654 (13.1)   |
| SBP, mm Hg, mean (SD)                                  | 121.1 (5.6)                                                              | 130.0 (7.1)  |
| DBP, mm Hg, mean (SD)                                  | 81.8 (2.2)                                                               | 79.3 (6.2)   |
| Total cholesterol, mg/dL, mean (SD)                    | 192.0 (34.3)                                                             | 187.4 (39.5) |
| HDL cholesterol, mg/dL, mean (SD)                      | 60.9 (13.9)                                                              | 50.5 (15.8)  |
| Statin use, n (%)                                      | 24 (36.4)                                                                | 2,087 (41.6) |
| History of CVD or 10-year CVD risk $\geq 10\%$ , n (%) | 0 (0.0)                                                                  | 3,936 (78.4) |
| Age $\geq 65$ years with SBP $\geq 130$ mm Hg, n (%)   | 0 (0.0)                                                                  | 1,978 (39.4) |
| Diabetes, n (%)                                        | 0 (0.0)                                                                  | 1,475 (30.1) |
| Chronic kidney disease, n (%)                          | 0 (0.0)                                                                  | 1,382 (27.8) |
| Frailty indicators, n (%)                              |                                                                          |              |
| Depressive symptoms                                    | 9 (13.8)                                                                 | 624 (12.5)   |
| Low body mass index                                    | 0 (0.0)                                                                  | 18 (0.4)     |
| Cognitive impairment                                   | 1 (1.7)                                                                  | 352 (8.7)    |
| Exhaustion                                             | 11 (16.7)                                                                | 843 (16.8)   |
| Impaired mobility                                      | 11 (16.7)                                                                | 1,085 (21.6) |
| History of falls                                       | 2 (3.0)                                                                  | 403 (8.1)    |

ACC: American College of Cardiology; AHA: American Heart Association; CVD: cardiovascular disease; DBP: diastolic blood pressure; HDL: high-density lipoprotein; REGARDS: REasons for Geographic and Racial Differences in Stroke; SBP: systolic blood pressure; SD: standard deviation; US: United States.

\* Recommendations for antihypertensive medication intensification according to the 2017 ACC/AHA blood pressure guideline include SBP between 130 and 139 mm Hg or DBP between 80 and 89 mm Hg with diabetes, chronic kidney disease, a history of CVD or a 10-year predicted CVD risk  $\geq 10\%$ , age  $< 65$  years, or age  $\geq 65$  years with SBP  $\geq 130$  mm Hg. Participants  $\geq 65$  years of age with SBP  $< 130$  mm Hg, DBP between 80 and 89 mm Hg and a 10-year predicted CVD risk  $< 10\%$  who do not have diabetes, chronic kidney disease or a history of CVD are not recommended antihypertensive medication intensification according to the 2017 ACC/AHA blood pressure guideline.

<sup>†</sup> Stroke buckle includes coastal North Carolina, South Carolina and Georgia.

<sup>‡</sup> Stroke belt includes the remaining parts of the stroke buckle states and Tennessee, Mississippi, Alabama, Louisiana and Arkansas.

<sup>§</sup> Other US regions includes the remaining 40 contiguous US states and the District of Columbia.



**Online Table 7.** Rates of CVD events and all-cause mortality among 15,179 REGARDS study participants taking antihypertensive medication by blood pressure category and recommendation for pharmacological antihypertensive treatment intensification stratified by gender and race.

|                                                                                                                                | CVD events               |                                         | All-cause mortality      |                                         |
|--------------------------------------------------------------------------------------------------------------------------------|--------------------------|-----------------------------------------|--------------------------|-----------------------------------------|
|                                                                                                                                | Events /<br>Person-years | Rate (95% CI) per<br>1,000 person-years | Events /<br>Person-years | Rate (95% CI) per<br>1,000 person-years |
| <b>Men</b>                                                                                                                     |                          |                                         |                          |                                         |
| <b>SBP/DBP, mm Hg*</b>                                                                                                         |                          |                                         |                          |                                         |
| <130 and <80                                                                                                                   | 446 / 15,300             | 29.2 (26.4, 31.9)                       | 682 / 16,533             | 41.3 (38.2, 44.3)                       |
| 130-139 or 80-89                                                                                                               | 433 / 16,258             | 26.6 (24.1, 29.1)                       | 622 / 17,591             | 35.4 (32.6, 38.1)                       |
| ≥140 or ≥90                                                                                                                    | 528 / 13,714             | 38.5 (35.2, 41.8)                       | 742 / 15,154             | 49.0 (45.4, 52.5)                       |
| <b>Recommendation for antihypertensive medication intensification by the 2017 ACC/AHA blood pressure guideline<sup>†</sup></b> |                          |                                         |                          |                                         |
| Not recommended <sup>‡</sup>                                                                                                   | -                        | -                                       | -                        | -                                       |
| Recommended                                                                                                                    | 433 / 16,258             | 26.6 (24.1, 29.1)                       | 622 / 17,591             | 35.4 (32.6, 38.1)                       |
| <b>Women</b>                                                                                                                   |                          |                                         |                          |                                         |
| <b>SBP/DBP, mm Hg*</b>                                                                                                         |                          |                                         |                          |                                         |
| <130 and <80                                                                                                                   | 358 / 24,987             | 14.3 (12.8, 15.8)                       | 358 / 24,987             | 14.3 (12.8, 15.8)                       |
| 130-139 or 80-89                                                                                                               | 293 / 16,987             | 17.2 (15.3, 19.2)                       | 293 / 16,987             | 17.2 (15.3, 19.2)                       |
| ≥140 or ≥90                                                                                                                    | 224 / 8,469              | 26.4 (23.0, 29.9)                       | 224 / 8,469              | 26.4 (23.0, 29.9)                       |
| <b>Recommendation for antihypertensive medication intensification by the 2017 ACC/AHA blood pressure guideline<sup>†</sup></b> |                          |                                         |                          |                                         |
| Not recommended                                                                                                                | 2 / 523                  | 3.8 (0.0, 9.1)                          | 3 / 538                  | 5.6 (0.0, 11.9)                         |
| Recommended                                                                                                                    | 373 / 19,786             | 18.9 (16.9, 20.8)                       | 526 / 20,854             | 25.2 (23.1, 27.4)                       |
| <b>Blacks</b>                                                                                                                  |                          |                                         |                          |                                         |
| <b>SBP/DBP, mm Hg*</b>                                                                                                         |                          |                                         |                          |                                         |
| <130 and <80                                                                                                                   | 339 / 17,295             | 19.6 (17.5, 21.7)                       | 531 / 18,215             | 29.2 (26.7, 31.6)                       |
| 130-139 or 80-89                                                                                                               | 376 / 18,446             | 20.4 (18.3, 22.4)                       | 555 / 19,576             | 28.4 (26.0, 30.7)                       |
| ≥140 or ≥90                                                                                                                    | 564 / 16,977             | 33.2 (30.5, 36.0)                       | 794 / 18,611             | 42.7 (39.7, 45.6)                       |
| <b>Recommendation for antihypertensive medication intensification by the 2017 ACC/AHA blood pressure guideline<sup>†</sup></b> |                          |                                         |                          |                                         |
| Not recommended                                                                                                                | 1 / 284                  | 3.5 (0.0, 10.4)                         | 1 / 291                  | 3.4 (0.0, 10.2)                         |
| Recommended                                                                                                                    | 375 / 18,162             | 20.6 (18.6, 22.7)                       | 554 / 19,285             | 28.7 (26.3, 31.1)                       |

### Whites

#### SBP/DBP, mm Hg\*

|                                                                                                                                |              |                   |              |                   |
|--------------------------------------------------------------------------------------------------------------------------------|--------------|-------------------|--------------|-------------------|
| <130 and <80                                                                                                                   | 534 / 22,525 | 23.7 (21.7, 25.7) | 758 / 23,953 | 31.6 (29.4, 33.9) |
| 130-139 or 80-89                                                                                                               | 432 / 18,120 | 23.8 (21.6, 26.1) | 596 / 19,408 | 30.7 (28.2, 33.2) |
| ≥140 or ≥90                                                                                                                    | 450 / 13,224 | 34.0 (30.9, 37.2) | 613 / 14,497 | 42.3 (38.9, 45.6) |
| <b>Recommendation for antihypertensive medication intensification by the 2017 ACC/AHA blood pressure guideline<sup>†</sup></b> |              |                   |              |                   |
| Not recommended                                                                                                                | 1 / 239      | 4.2 (0.0, 12.4)   | 2 / 247      | 8.1 (0.0, 19.3)   |
| Recommended                                                                                                                    | 431 / 17,882 | 24.1 (21.8, 26.4) | 594 / 19,161 | 31.0 (28.5, 33.5) |

ACC: American College of Cardiology; AHA: American Heart Association; CVD: cardiovascular disease; HDL: high-density lipoprotein; REGARDS: REasons for Geographic and Racial Differences in Stroke; SD: standard deviation.

\* Blood pressure categories are mutually exclusive. Participants whose SBP and DBP correspond to two separate categories were assigned to the higher blood pressure group.

<sup>†</sup> Analyses of the recommendation for antihypertensive medication intensification were restricted to participants with SBP between 130 and 139 mm Hg or DBP between 80 and 89 mm Hg. Recommendations for antihypertensive medication intensification according to the 2017 ACC/AHA blood pressure guideline include SBP between 130 and 139 mm Hg or DBP between 80 and 89 mm Hg with diabetes, chronic kidney disease, a history of CVD or a 10-year predicted CVD risk ≥10%, age <65 years, or age ≥65 years with SBP ≥130 mm Hg. Participants ≥65 years of age with SBP <130 mm Hg, DBP between 80 and 89 mm Hg and a 10-year predicted CVD risk <10% who do not have diabetes, chronic kidney disease or a history of CVD are not recommended antihypertensive medication intensification according to the 2017 ACC/AHA blood pressure guideline.

<sup>‡</sup> All men with SBP between 130 and 139 mm Hg or DBP between 80 or 89 mm Hg were recommended antihypertensive medication initiation according to the 2017 ACC/AHA blood pressure guideline.

The median follow-up for CVD events was 7.8 years (maximum 11.8 years). The median follow-up for all-cause mortality was 8.2 years (maximum 11.9 years).

**Online Figure 1.** Flow-chart of REGARDS study participants included in the current analysis.

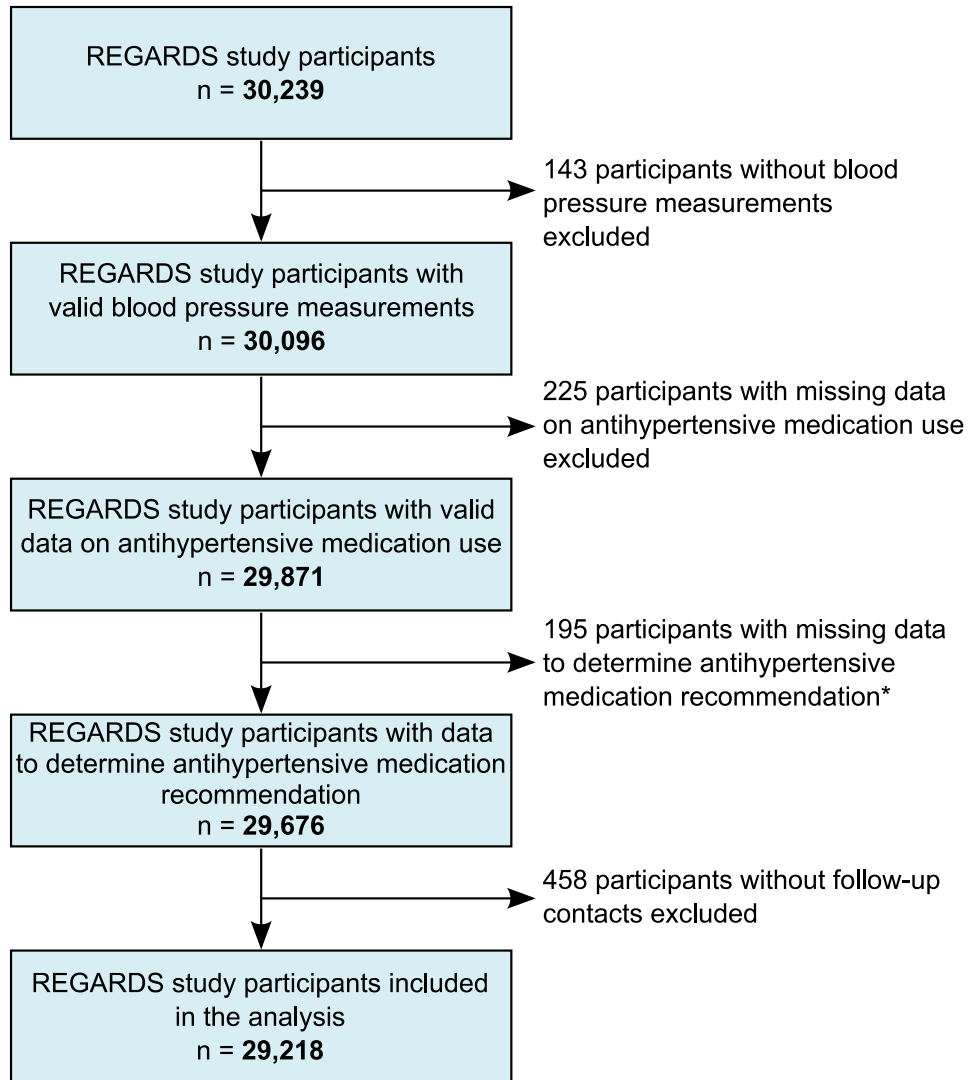

ACC: American College of Cardiology; AHA: American Heart Association; CVD: cardiovascular disease; DBP: diastolic blood pressure; REGARDS: REasons for Geographic and Racial Differences in Stroke; SBP: systolic blood pressure.

\* Some participants with SBP between 130 and 139 mm Hg or DBP between 80 and 89 mm Hg not taking antihypertensive medication who were not recommended pharmacological treatment initiation based on the information available had missing data on diabetes, chronic kidney disease or variables used to calculate the 10-year predicted CVD risk, including cigarette smoking, and total and high-density lipoprotein cholesterol (n=108). These participants were excluded from the analysis as it was not possible to confirm that they were not recommended antihypertensive medication initiation by the 2017 ACC/AHA blood pressure guideline (see **Online Table 2**, top panel). For consistency, participants with SBP between 130 and 139 mm Hg or DBP between 80 and 89 mm Hg taking antihypertensive medication who were not recommended pharmacological treatment intensification and had missing data on these variables were also excluded (n=87).

**Online Figure 2.** Distribution of REGARDS study participants taking antihypertensive medication by blood pressure categories and recommendation for pharmacological antihypertensive treatment intensification.

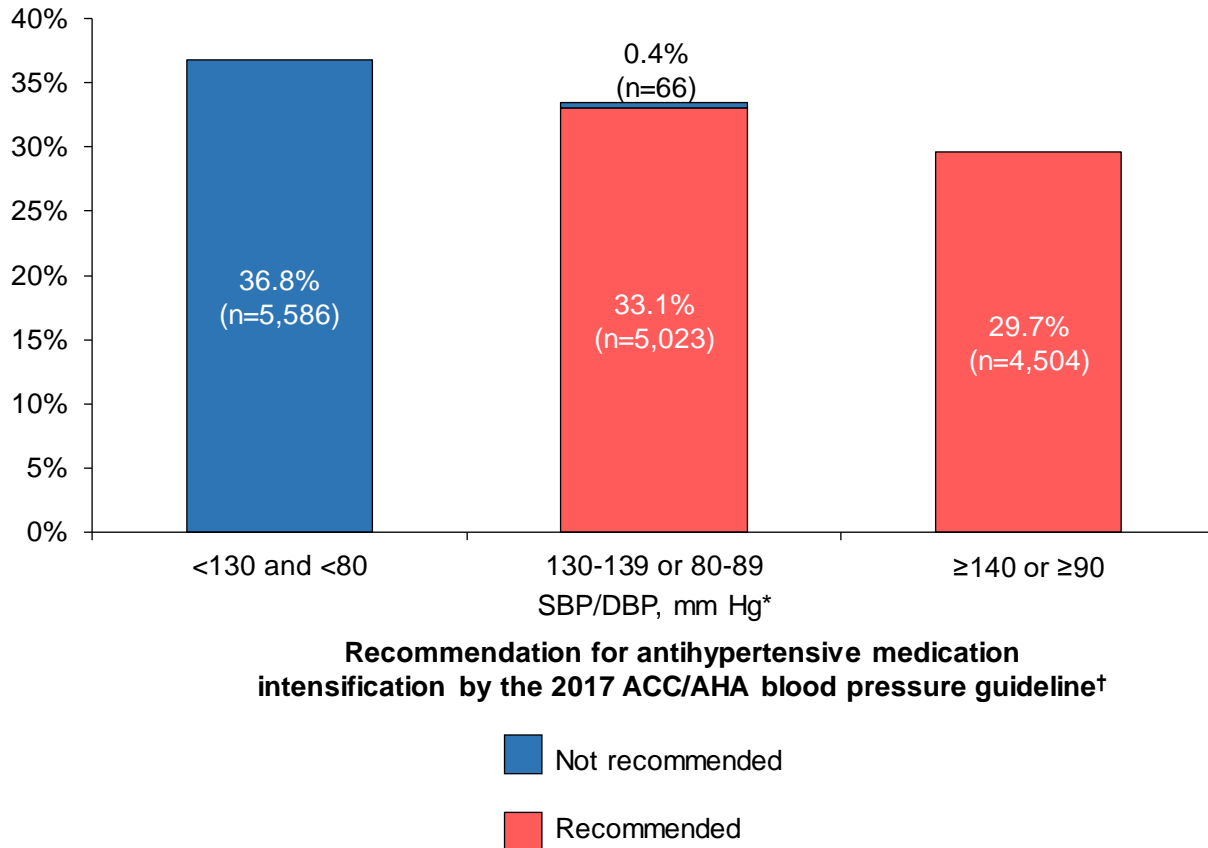

ACC: American College of Cardiology; AHA: American Heart Association; DBP: diastolic blood pressure; REGARDS: REasons for Geographic and Racial Differences in Stroke; SBP: systolic blood pressure.

\* Blood pressure categories are mutually exclusive. Participants whose SBP and DBP correspond to two separate categories were assigned to the higher blood pressure group.

† Recommendations for antihypertensive medication intensification according to the 2017 ACC/AHA blood pressure guideline include SBP  $\geq 130$  mm Hg or DBP  $\geq 80$  mm Hg with diabetes, chronic kidney disease, a history of CVD or a 10-year predicted CVD risk  $\geq 10\%$ , age  $< 65$  years, or age  $\geq 65$  years with SBP  $\geq 130$  mm Hg. Participants  $\geq 65$  years of age with SBP  $< 130$  mm Hg, DBP between 80 and 89 mm Hg and a 10-year predicted CVD risk  $< 10\%$  who do not have diabetes, chronic kidney disease or a history of CVD are not recommended antihypertensive medication intensification according to the 2017 ACC/AHA blood pressure guideline.

## References

1. Callahan CM, Unverzagt FW, Hui SL, Perkins AJ, Hendrie HC. Six-item screener to identify cognitive impairment among potential subjects for clinical research. *Med Care* 2002;40:771-81.
2. Radloff LS. The CES-D Scale: A self-report depression scale for research in the general population. *Appl Psychol Meas* 1977;1:385-401.
3. Ware J, Jr., Kosinski M, Keller SD. A 12-Item Short-Form Health Survey: construction of scales and preliminary tests of reliability and validity. *Med Care* 1996;34:220-33.
4. Goff DC, Jr., Lloyd-Jones DM, Bennett G et al. 2013 ACC/AHA guideline on the assessment of cardiovascular risk: a report of the American College of Cardiology/American Heart Association Task Force on Practice Guidelines. *Circulation* 2014;129:S49-73.
